# Supplementary material
Source: PubMed Central journal article supplement (PMC8504946)
Supplement: sj-pdf-1-jcb-10.1177_0271678X211007960.pdf [file sj-pdf-1-jcb-10.1177_0271678X211007960.pdf]

**Table S1. Between-group differences of ALFF-CBF maps in ES**

| Brain Region                         | Left or right hemispheres | Label ID |
|--------------------------------------|---------------------------|----------|
| <b>A. ESRD &gt; HCs</b>              |                           |          |
| No between-group differences         |                           |          |
| <b>B. ESRD &lt; HCs</b>              |                           |          |
| Superior Frontal Gyrus(SFG)          | SFG_L_7_1                 | 1        |
|                                      | SFG_L_7_2                 | 3        |
| Middle Frontal Gyrus(MFG)            | MFG_L_7_1                 | 15       |
| Orbital Gyrus(OrG)                   | OrG_L_6_2                 | 43       |
| Precentral Gyrus(PrG)                | PrG_L_6_6                 | 63       |
| Superior Temporal Gyrus(STG)         | STG_L_6_2                 | 71       |
| Middle Temporal Gyrus(MTG)           | MTG_L_4_1                 | 81       |
|                                      | MTG_L_4_3                 | 85       |
| Fusiform Gyrus(FuG)                  | FuG_L_3_2                 | 105      |
|                                      | FuG_R_3_2                 | 106      |
|                                      | FuG_L_3_3                 | 107      |
|                                      | FuG_R_3_3                 | 108      |
| Insular Gyrus(INS)                   | INS_R_6_1                 | 164      |
|                                      | INS_L_6_5                 | 171      |
| Cingulate Gyrus(CG)                  | CG_R_7_6                  | 186      |
|                                      | CG_L_7_7                  | 187      |
|                                      | CG_R_7_7                  | 188      |
| MedioVentral Occipital Cortex(MVOcC) | MVOcC_R_5_5               | 198      |
| Lateral Occipital Cortex(LOcC)       | LOcC_L_4_2                | 201      |
| Amygdala(Amyg)                       | Amyg_L_2_1                | 211      |
| Basal Ganglia(BG)                    | BG_L_6_4                  | 225      |
| Thalamus(Tha)                        | Tha_R_8_7                 | 244      |

ALFF-CBF= amplitude of low frequency fluctuation-cerebral blood flow correlation coefficient; MNI= montreal neurological institute; FDR= false discovery rate.

**ESRD patients and HCs at brain region level ( $p < 0.01$ , FDR corrected).**

| Modified cyto-architectonic                 | MNI |     |     | <i>t</i> -value | <i>p</i> -value |
|---------------------------------------------|-----|-----|-----|-----------------|-----------------|
|                                             | X   | Y   | Z   |                 |                 |
| A8m, medial area 8                          | -5  | 15  | 54  | 3.586           | 0.001           |
| A8dl, dorsolateral area 8                   | -18 | 24  | 53  | 2.749           | 0.009           |
| A9/46d, dorsal area 9/46                    | -27 | 43  | 31  | 2.873           | 0.006           |
| A12/47o, orbital area 12/47                 | -36 | 33  | -16 | 3.477           | 0.001           |
| A6cvl, caudal ventrolateral area 6          | -49 | 5   | 30  | 2.796           | 0.008           |
| A41/42, area 41/42                          | -54 | -32 | 12  | 2.938           | 0.005           |
| A21c, caudal area 21                        | -65 | -30 | -12 | 3.411           | 0.001           |
| A37dl, dorsolateral area 37                 | -59 | -58 | 4   | 3.216           | 0.002           |
| A37mv, medioventral area 37                 | -31 | -64 | -14 | 3.143           | 0.003           |
| A37mv, medioventral area 37                 | 31  | -64 | -14 | 2.845           | 0.007           |
| A37lv, lateroventral area 37                | -42 | -51 | -17 | 2.766           | 0.008           |
| A37lv, lateroventral area 37                | 43  | -49 | -19 | 2.886           | 0.006           |
| G, hypergranular insula                     | 37  | -18 | 8   | 3.479           | 0.001           |
| dIg, dorsal granular insula                 | -38 | -8  | 8   | 2.909           | 0.006           |
| A23c, caudal area 24                        | 6   | -20 | 40  | 2.716           | 0.009           |
| A32sg, subgenual area 32                    | -4  | 39  | -2  | 2.969           | 0.005           |
| A32sg, subgenual area 32                    | 5   | 41  | 6   | 2.809           | 0.007           |
| vmPOS, ventromedial parietooccipital sulcus | 15  | -63 | 12  | 3.198           | 0.002           |
| V5/MT+, area V5/MT+                         | -46 | -74 | 3   | 3.352           | 0.002           |
| mAmyg, medial amygdala                      | -19 | -2  | -20 | 3.359           | 0.002           |
| vmPu, ventromedial putamen                  | -23 | 7   | -4  | 2.779           | 0.008           |
| cTtha, caudal temporal thalamus             | 10  | -14 | 14  | 2.701           | 0.009           |

ion coefficients; ESRD= end-stage renal disease; HCs= healthy control subjects; MNI=
