# Supplementary material
Source: PubMed Central journal article supplement (PMC8504946)
Supplement: sj-pdf-3-jcb-10.1177_0271678X211007960.pdf [file sj-pdf-3-jcb-10.1177_0271678X211007960.pdf]

**Table S2. Between-group differences of fALFF-CBF maps in E**

| Brain Region                  | Left or right hemispheres | Label ID |
|-------------------------------|---------------------------|----------|
| <b>A. ESRD &gt; HCs</b>       |                           |          |
| No between-group differences  |                           |          |
| <b>B. ESRD &lt; HCs</b>       |                           |          |
| Superior Frontal Gyrus(SFG)   | SFG_L_7_1                 | 1        |
| Middle Frontal Gyrus(MFG)     | MFG_R_7_7                 | 28       |
| Orbital Gyrus(OrG)            | OrG_L_6_5                 | 49       |
| Superior Temporal Gyrus(STG)  | STG_L_6_2                 | 71       |
| Middle Temporal Gyrus(MTG)    | MTG_R_4_2                 | 84       |
|                               | MTG_L_4_3                 | 85       |
| Inferior Temporal Gyrus(ITG)  | ITG_R_7_3                 | 94       |
| Fusiform Gyrus(FuG)           | FuG_R_3_2                 | 106      |
| Inferior Parietal Lobule(IPL) | IPL_L_6_5                 | 143      |
|                               | CG_L_7_1                  | 175      |
| Cingulate Gyrus(CG)           | CG_R_7_1                  | 176      |
|                               | CG_L_7_7                  | 187      |
|                               | CG_R_7_7                  | 188      |
| Basal Ganglia(BG)             | BG_L_6_4                  | 225      |

fALFF-CBF= fractional amplitude of low frequency fluctuation-cerebral blood flow; MNI= montreal neurological institute; FDR= false discovery rate.

---

**SRD patients and HCs at brain region level ( $p < 0.01$ , FDR corrected).**

---

| Modified cyto-architectonic       | MNI |     |     | <i>t</i> -value | <i>p</i> -value |
|-----------------------------------|-----|-----|-----|-----------------|-----------------|
|                                   | X   | Y   | Z   |                 |                 |
| A8m, medial area 8                | -5  | 15  | 54  | 3.095           | 0.003           |
| A10l, lateral area 10             | 25  | 61  | -4  | 3.223           | 0.002           |
| A13, area 13                      | -10 | 18  | -19 | 2.853           | 0.007           |
| A41/42, area 41/42                | -54 | -32 | 12  | 3.046           | 0.004           |
| A21r, rostral area 21             | 51  | 6   | -32 | 3.205           | 0.002           |
| A37dl, dorsolateral area 37       | -59 | -58 | 4   | 3.314           | 0.001           |
| A20r, rostral area 20             | 40  | 0   | -43 | 4.649           | <0.001          |
| A37mv, medioventral area 37       | 31  | -62 | -14 | 3.014           | 0.004           |
| A39rv, rostroventral area 39(PGa) | -47 | -65 | 26  | 3.622           | 0.001           |
| A23d, dorsal area 23              | -4  | -39 | 31  | 2.899           | 0.006           |
| A23d, dorsal area 23              | 4   | -37 | 32  | 2.978           | 0.005           |
| A32sg, subgenual area 32          | -4  | 39  | -2  | 2.893           | 0.006           |
| A32sg, subgenual area 32          | 5   | 41  | 6   | 3.301           | 0.002           |
| vmPu, ventromedial putamen        | -23 | 7   | -4  | 2.697           | 0.009           |

---

low correlation coefficients; ESRD= end-stage renal disease; HCs= healthy control
