# Supplementary material
Source: PubMed Central journal article supplement (PMC8504946)
Supplement: sj-pdf-5-jcb-10.1177_0271678X211007960.pdf [file sj-pdf-5-jcb-10.1177_0271678X211007960.pdf]

**Table S3. Between-group differences of ReHo-CBF maps in ES**

| Brain Region                   | Left or right hemispheres | Label ID |
|--------------------------------|---------------------------|----------|
| <b>A. ESRD &gt; HCs</b>        |                           |          |
| No between-group differences   |                           |          |
| <b>B. ESRD &lt; HCs</b>        |                           |          |
| Superior Frontal Gyrus(SFG)    | SFG_L_7_1                 | 1        |
| Middle Frontal Gyrus(MFG)      | MFG_L_7_1                 | 15       |
| Inferior Temporal Gyrus(ITG)   | ITG_R_7_3                 | 94       |
| Fusiform Gyrus(FuG)            | FuG_R_3_2                 | 106      |
| Cingulate Gyrus(CG)            | CG_R_7_7                  | 188      |
| Lateral Occipital Cortex(LOcC) | LOcC_L_4_4                | 205      |
|                                | LOcC_R_2_2                | 210      |
| Thalamus(Tha)                  | Tha_L_8_4                 | 237      |

ReHo-CBF= regional homogeneity-cerebral blood flow correlation coefficients; ESRD= end-stage renal disease; FNI= First Neurological Institute; FDR= false discovery rate.

**ESRD patients and HCs at brain region level ( $p < 0.01$ , FDR corrected).**

| Modified cyto-architectonic              | MNI |     |     | $t$ -value | $p$ -value |
|------------------------------------------|-----|-----|-----|------------|------------|
|                                          | X   | Y   | Z   |            |            |
| A8m, medial area 8                       | -5  | 15  | 54  | 2.966      | 0.005      |
| A9/46d, dorsal area 9/46                 | -27 | 43  | 31  | 3.228      | 0.002      |
| A20r, rostral area 20                    | 40  | 0   | -43 | 2.776      | 0.008      |
| A37mv, medioventral area 37              | 31  | -62 | -14 | 2.791      | 0.007      |
| A32sg, subgenual area 32                 | 5   | 41  | 6   | 4.287      | <0.001     |
| iOccG, inferior occipital gyrus          | -30 | -88 | -12 | 3.254      | 0.002      |
| lsOccG, lateral superior occipital gyrus | 29  | -75 | 36  | 2.717      | 0.009      |
| rTha, rostral temporal thalamus          | -7  | -14 | 7   | 2.808      | 0.007      |

ESRD= end-stage renal disease; HCs= healthy control subjects; MNI= montreal
