# Supplementary material
Source: PubMed Central journal article supplement (PMC8504946)
Supplement: sj-pdf-7-jcb-10.1177_0271678X211007960.pdf [file sj-pdf-7-jcb-10.1177_0271678X211007960.pdf]

**Table S4. Between-group differences of DC-CBF maps in ESI**

| Brain Region                         | Left or right hemispheres | Label ID |
|--------------------------------------|---------------------------|----------|
| A. ESRD > HCs                        |                           |          |
| No between-group differences         |                           |          |
| B. ESRD < HCs                        |                           |          |
| Inferior Frontal Gyrus(IFG)          | IFG_R_6_6                 | 40       |
| Fusiform Gyrus(FuG)                  | FuG_R_3_2                 | 106      |
| MedioVentral Occipital Cortex(MVOcC) | MVOcC_R_5_5               | 198      |
| Lateral Occipital Cortex(LOcC)       | LOcC_L_4_4                | 205      |
| Amygdala                             | Amyg_R_2_2                | 214      |

DC-CBF= degree centrality-cerebral blood flow correlation coefficients; ESRD= institute; FDR= false discovery rate.

**RD patients and HCs at brain region level ( $p < 0.01$ , FDR corrected).**

| Modified cyto-architectonic                 | MNI |     |     | $t$ -value | $p$ -value |
|---------------------------------------------|-----|-----|-----|------------|------------|
|                                             | X   | Y   | Z   |            |            |
| A44v, ventral area 44                       | 54  | 14  | 11  | 2.959      | 0.005      |
| A37mv, medioventral area 37                 | 31  | -62 | -14 | 3.113      | 0.003      |
| vmPOS, ventromedial parietooccipital sulcus | 15  | -63 | 12  | 2.741      | 0.009      |
| iOccG, inferior occipital gyrus             | -30 | -88 | -12 | 2.749      | 0.009      |
| lAmyg, lateral amygdala                     | 28  | -3  | -20 | 3.108      | 0.003      |

end-stage renal disease; HCs= healthy control subjects; MNI= montreal neurological
