# Supplementary material
Source: PubMed Central journal article supplement (PMC8504946)

**HCs****ESRD**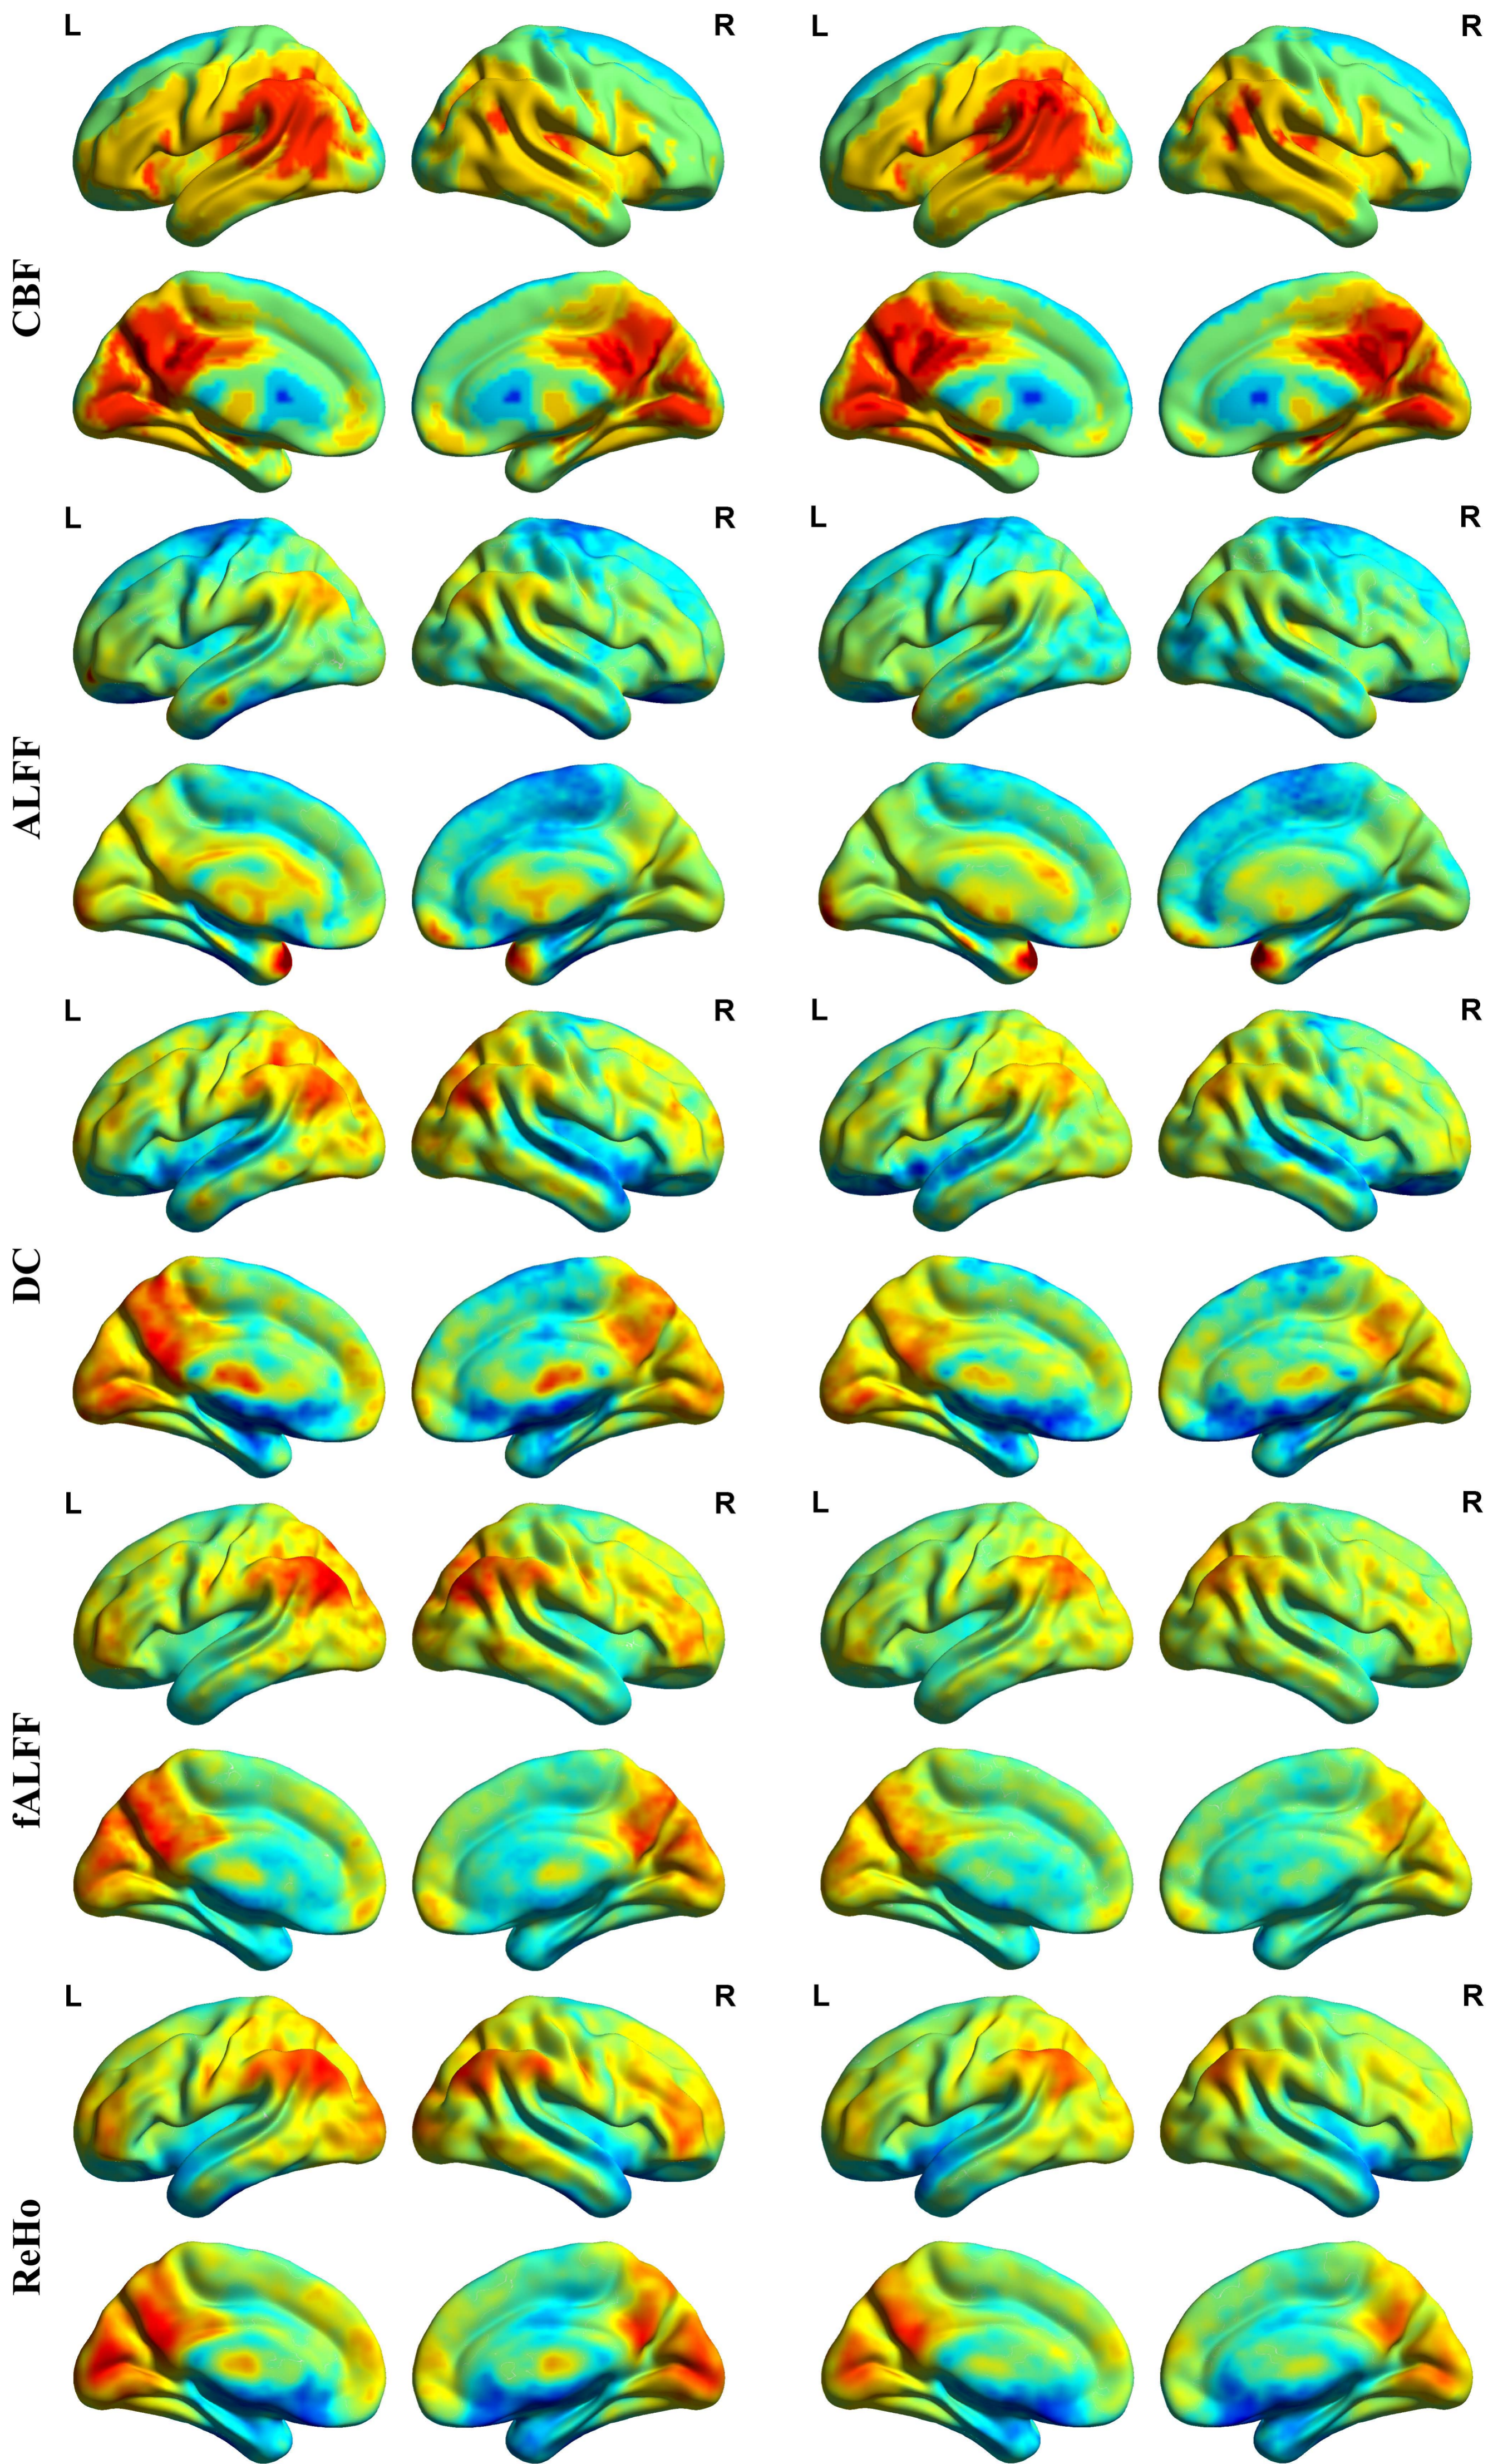**-3**  **3**

Supplement: sj-pdf-11-jcb-10.1177_0271678X211007960.pdf [file sj-pdf-11-jcb-10.1177_0271678X211007960.pdf]

**DC**

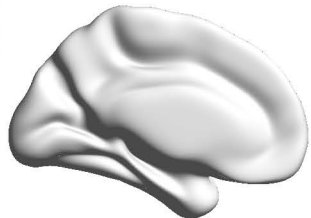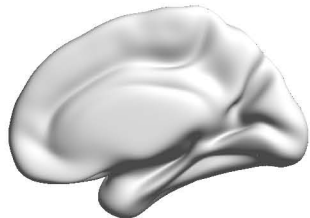

**ReHo**

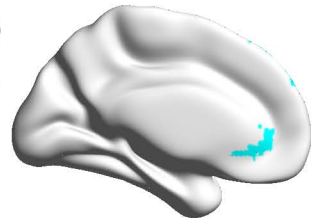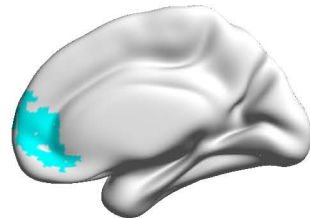

**ReHo**

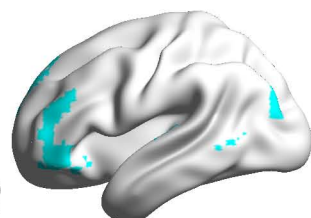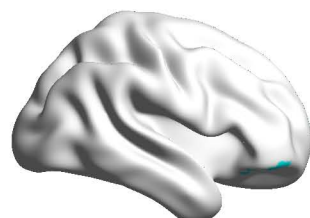

**fALFF**

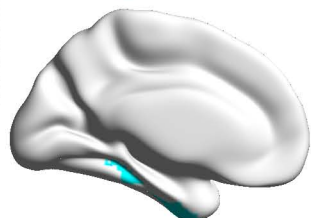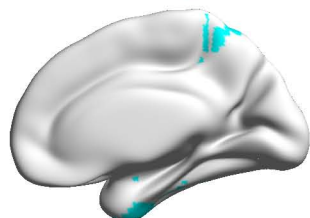

**ALFF**

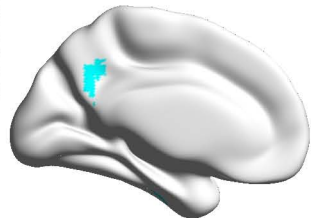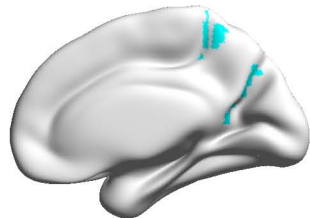

**CBF**

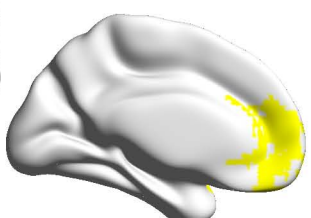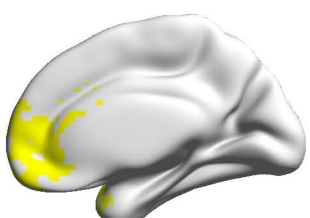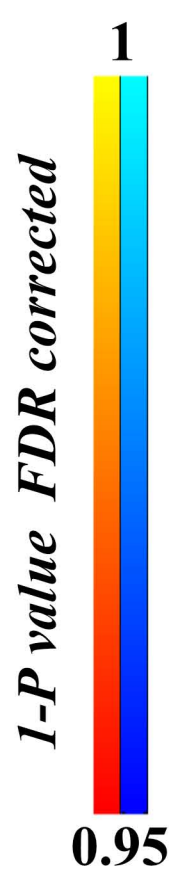

Supplement: sj-pdf-12-jcb-10.1177_0271678X211007960.pdf [file sj-pdf-12-jcb-10.1177_0271678X211007960.pdf]

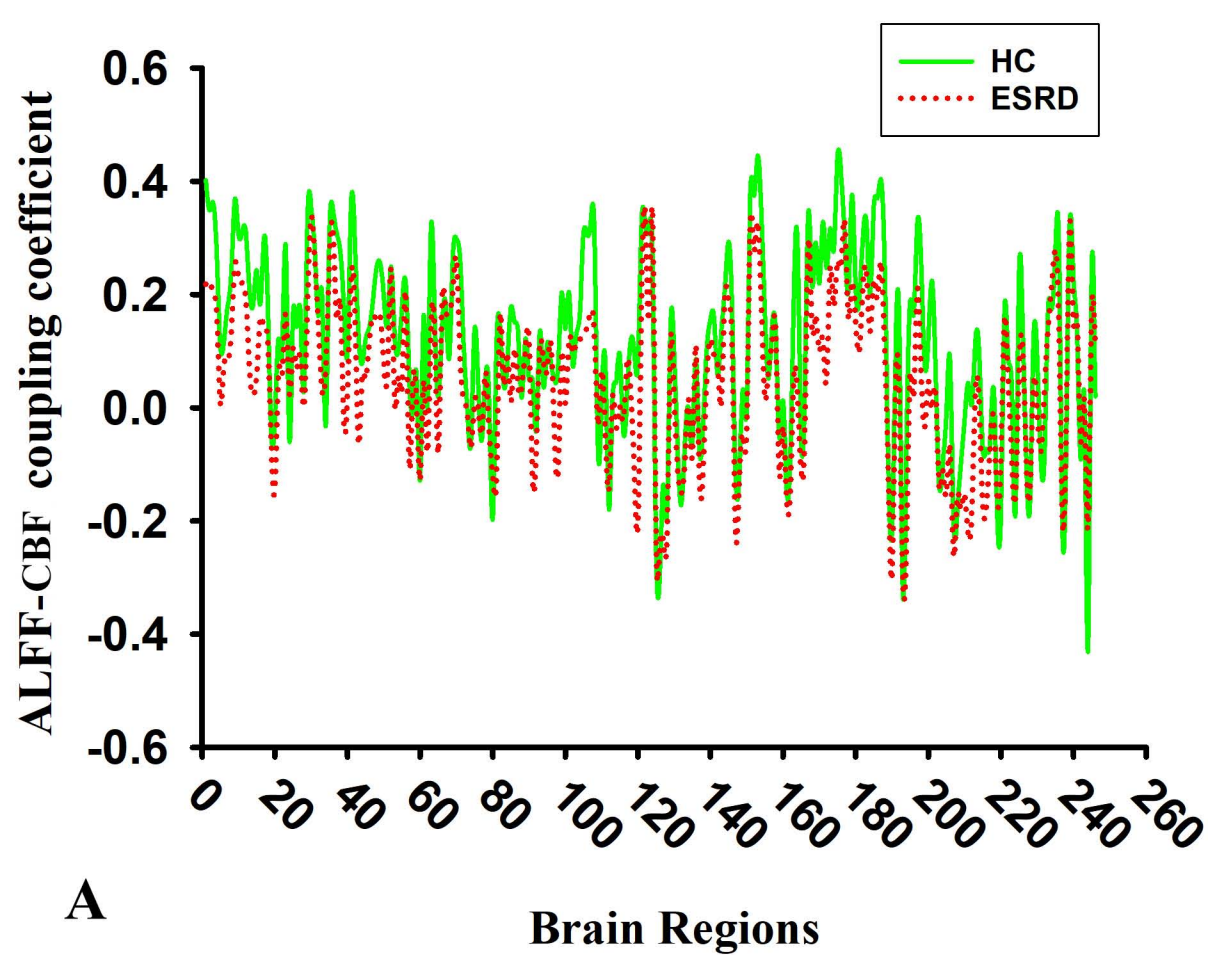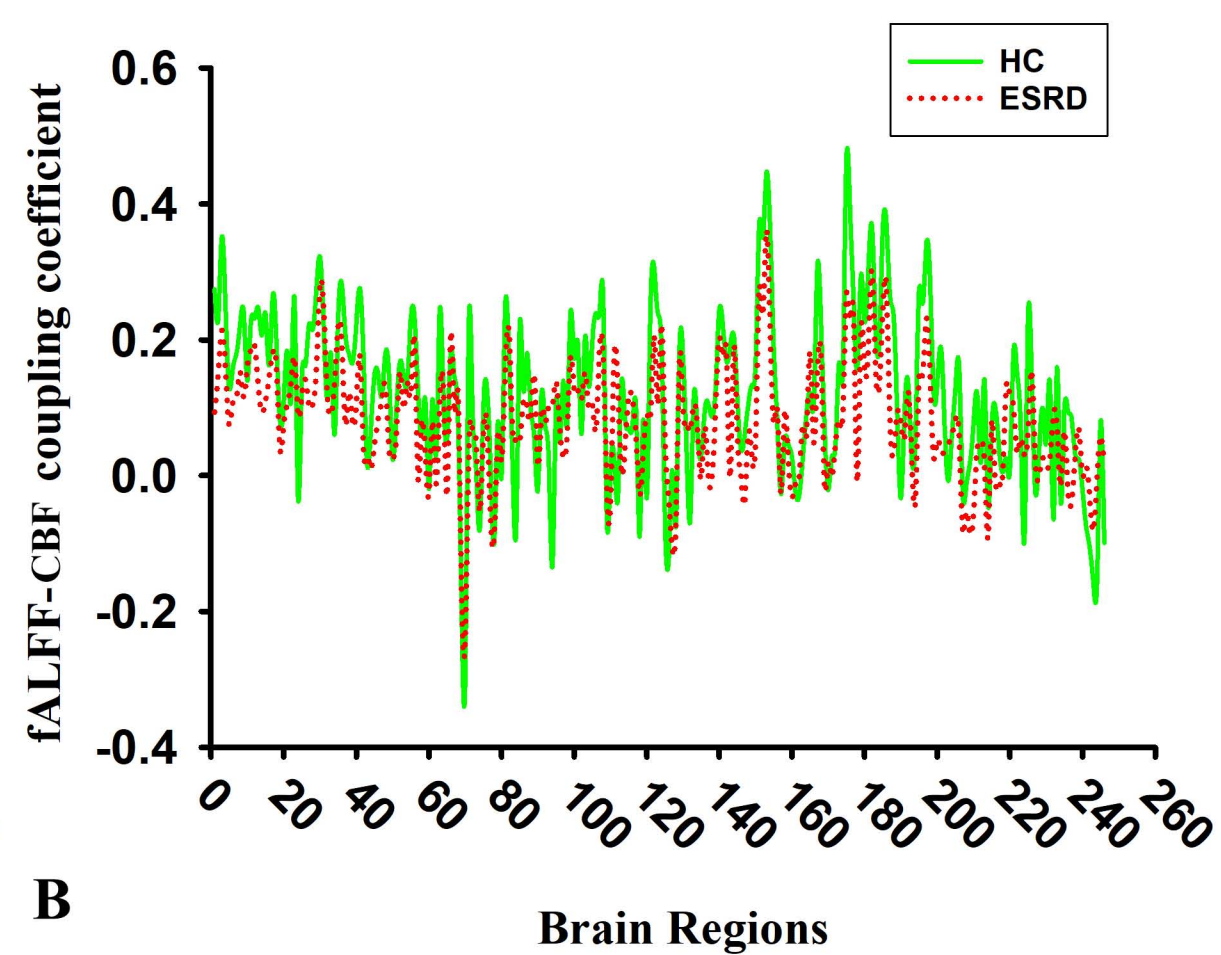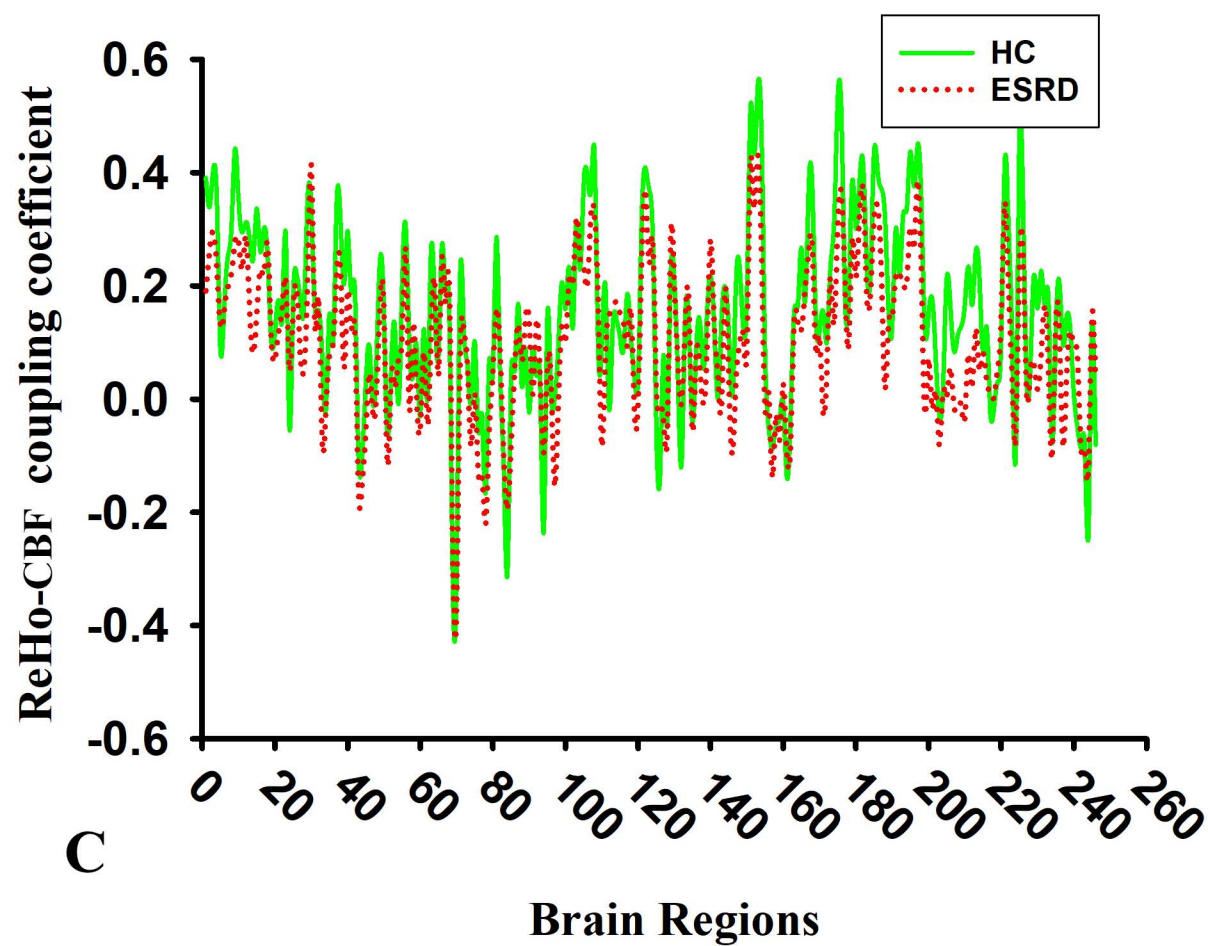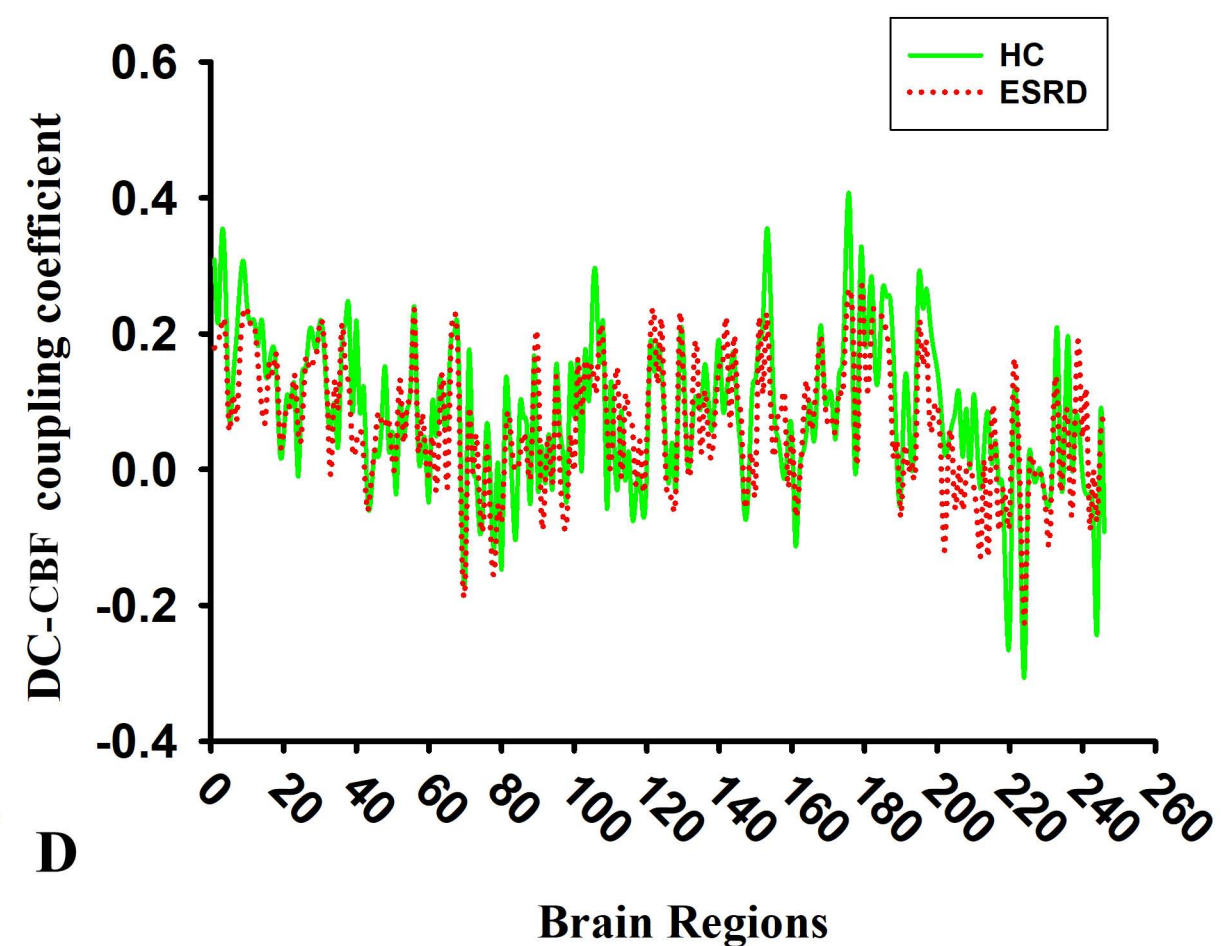

Supplement: sj-pdf-13-jcb-10.1177_0271678X211007960.pdf [file sj-pdf-13-jcb-10.1177_0271678X211007960.pdf]

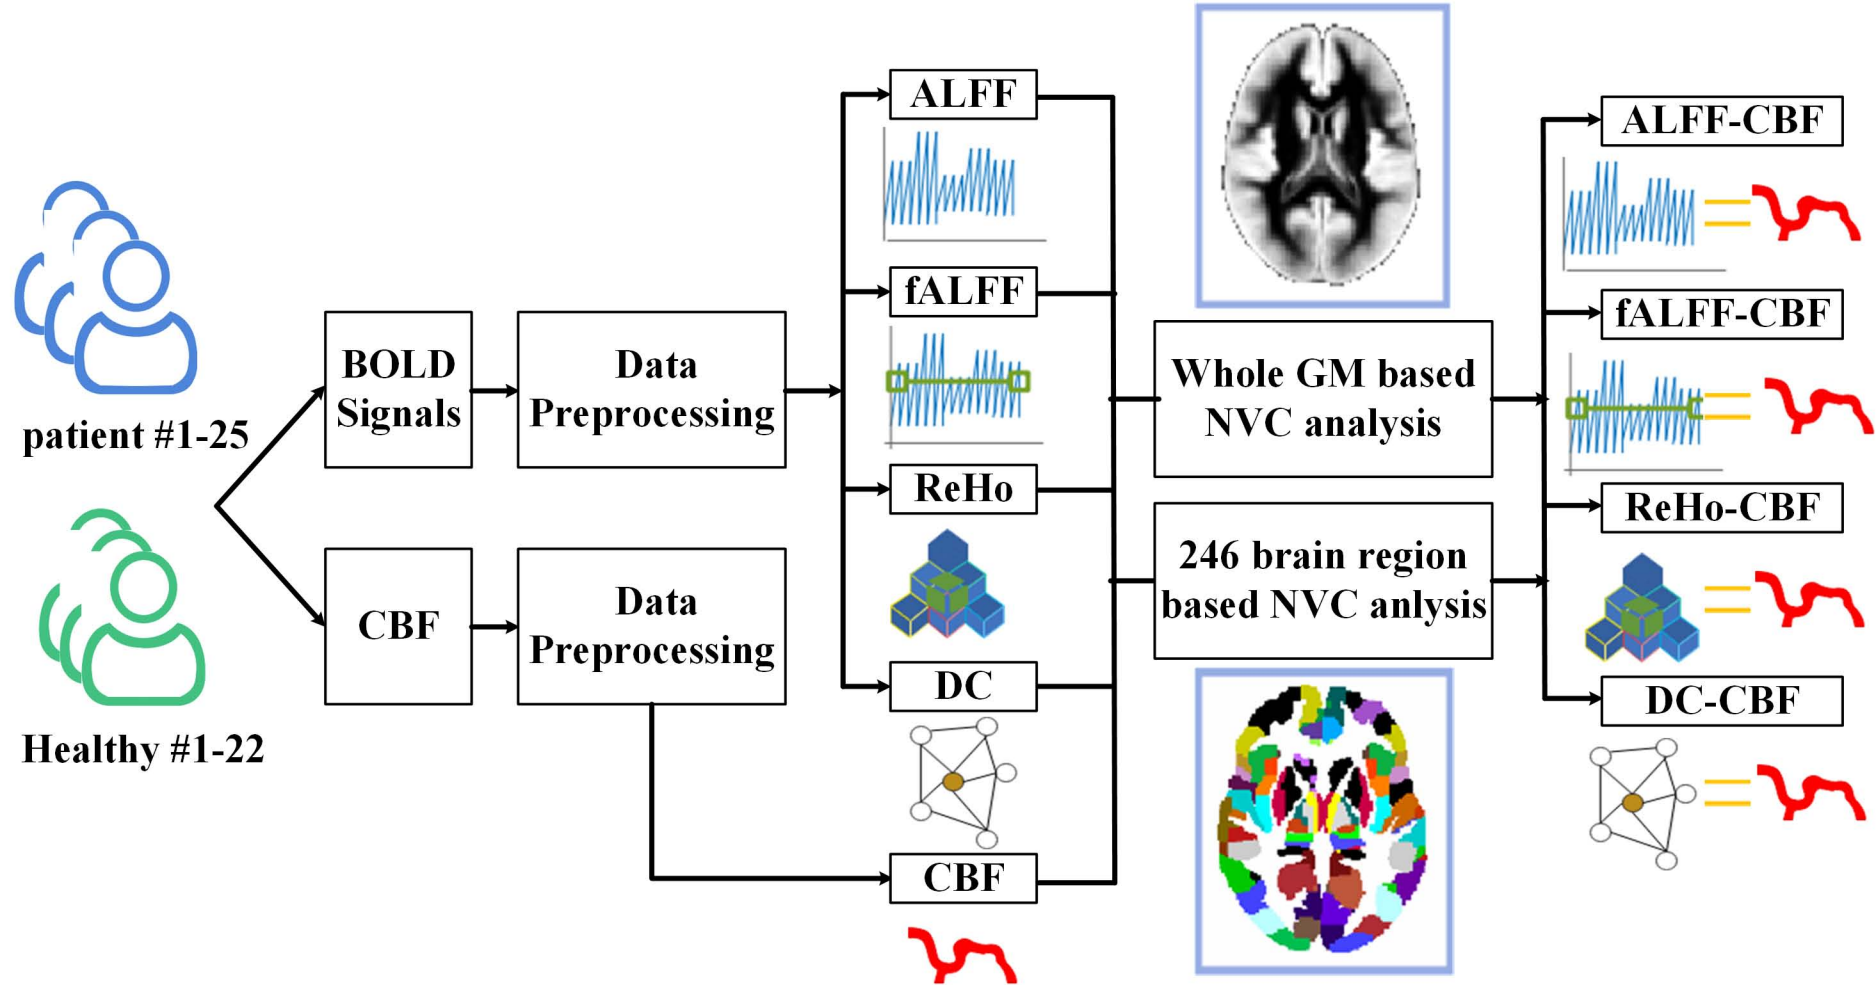

Supplement: sj-pdf-9-jcb-10.1177_0271678X211007960.pdf [file sj-pdf-9-jcb-10.1177_0271678X211007960.pdf]
